# Supplementary material for: Chicks change their pecking behaviour towards stationary and mobile food sources over the first 12 weeks of life: improvement and discontinuities
Source: PeerJ. 2014 Oct 23;2:e626. doi: 10.7717/peerj.626 (PMC4217182; doi:10.7717/peerj.626)
Supplement: Data S1 [file peerj-02-626-s001.xlsx]

## Sheet: Sheet1
chick	sex	batch	day8	day 11	day 14	day 17	day 20	day 23	day 26	day 29	day 32	day35	day38	day41	day44	day47	day50	day53	day56	day59	day62	day65
1	2	1	54.11	68.93	68.27	99	79.26	73.3	98.3	122.5	108.27	92.9	83.88	127.7	95.81	87.2	118.05	100.9	109.36	113	83.61	97
2	1	1	56.89	83.5	79.54	73.5	99.26	98.9	88.47	114.7	106.43	92.9	113.04	142	128.51	137.7	127.6	145	122.74	118	127.89	131.1
3	2	1	53.96	79.22	76.31	71.3	103.17	68.64	62.71	142.9	128.95	111.4	136.54	116	127.93	94.05	111.67	112.3	88	111.8	85.69	129
4	1	1	66.13	52.4	75.51	61.5	52.31	81	55.89	57.29	113.04	118	121.14	137	109.73	114.6	97.61	118.8	84.89	70	109.44	95.2
5	2	1	53.53	80.24	68.97	91.3	120.72	106.1	95.91	72.73	106.3	123.5	111.88	127.5	120.52	134	116.15	106.6	102.79	121.9	82.72	93.4
6	2	1	59.32	48.17	75.1	57.6	96.1	86.86	106.5	126.5	101.25	105.1	86.77	118	124.01	134.1	115.85	121.6	96.13	89	72.42	111
7	2	1	999	77.9	100.54	100	95.33	72.5	133.18	123.9	111.88	142	123.85	140	128.6	140	116.61	119.3	124.83	142	100.07	125
8	2	1	999	59.26	72.43	60	70.82	74.8	109.93	76.1	125.68	115	100.46	114.4	113.03	108.1	109.29	87.3	107.57	131	94.19	116
9	2	2	64.17	43.4	90.55	77.17	81.08	78.5	108.28	105.7	128.86	88.5	104.58	112.2	92.34	55.6	69.5	55.2	53.68	63.73	60.56	84.7
10	1	2	70.33	47	79.21	68.01	81.68	84.3	99.73	114.6	76.62	95.7	113.41	84.1	95.94	74.5	67.64	81.08	59.12	68.18	70.07	83.4
11	2	2	40.88	37.7	97.09	105.1	88.59	83.2	86.29	110.6	78.18	96.7	110.42	106.8	114.26	78.6	98.54	60.4	82.94	77.25	94.06	69.8
12	2	2	71.14	72.1	104.24	58.74	99.93	96.6	92.25	94.8	111.29	101.4	62.46	84.5	85.46	65.6	69.54	50.1	83.28	68.27	72	58.54
13	1	2	54.24	53.7	77.64	89.4	97.22	93.24	77.15	121.8	91.63	74.04	86	114.4	60.74	89.5	86.94	91.17	97.22	87.8	85.83	83.3
14	2	2	49.37	71.4	57.92	75.63	106.72	68.01	75.35	125	117.98	46.2	79.42	81.8	107.57	100.5	97.87	87.46	87.53	79.6	112.91	89.08
15	1	2	69.18	59.5	63.75	66.9	86.03	85.04	130.34	102.2	77.35	108.3	144.27	86.05	131.25	84.7	71.57	80.45	68.27	56.75	65.74	69.09
16	1	2	44.27	66.7	86	60.5	73.32	47.6	135.81	98.9	124.35	113.7	101.98	128.08	165.02	99.3	99.4	104.5	91.54	92.6	97.19	89.4
19	1	3	83.78	59.9	81.43	91.7	114.3	97.4	71.09	82.1	144.87	134.12	106.5	113.7	141.19	128.9	128.4	137.5	121.65	115.5	121.65	155.8
20	2	3	100.93	97.4	76.9	108	115.85	102.6	102.27	77.02	127.57	100.3	88.18	106.8	143.19	93.75	91.94	132.8	87.88	112.8	92.8	93.4
21	2	3	71.33	86.8	97.13	81.8	97.26	121.3	106.55	72.3	121.72	84.6	113.44	121.2	110.78	80.13	115.08	89.08	123.41	101.7	128.77	84.4
22	2	3	65.83	65.35	103.17	87.2	50.23	94.9	71.62	100.2	111.15	85.3	139.44	134.4	110.93	84.7	98.2	86.03	77.1	98.45	118.02	75.9
23	1	3	88.18	64.37	999	999	129.78	94.7	72.71	100.5	135.36	89.5	119.09	116.8	117.16	118.04	99.87	95.69	102.32	70.8	109.15	111.6
24	2	3	999	98.2	999	999	86.17	80.45	999	98.5	122.84	98.4	130.86	126.8	140.81	120.5	110.37	119.25	103.82	105.5	119.19	111.6
25	1	4	79.52	108.45	134.19	140.93	136.27	135.01	152.36	134.68	155.68	168.44	112.2	125.85	75.76	120.47	129.48	120.47	75.28	116.52	112.97	114.16
26	2	4	86.84	77.91	88.18	85.66	124.67	121.22	157.74	130.17	134.42	144.25	187.13	127.3	107.85	108.06	119.32	121.35	81.3	87.89	84.55	103.11
27	1	4	101.26	90.53	120.39	103.21	103.52	137.7	139.58	145.95	172.39	170.14	181.1	130.18	127.22	147.85	114.02	143.71	129.03	55.19	115.76	123.66
28	2	4	77.9	81.68	122.02	93.81	118.94	111.33	111.07	93.99	115.98	100.2	93.63	126.89	97.89	63.89	95.7	116.51	87.3	26.38	76.29	67.82
29	1	4	77.76	86.25	82.84	98.89	131.04	106.86	129.67	141.12	156.33	177.85	165.16	187.98	159.93	153.47	153.08	141.18	72.13	108.67	62.54	65
30	2	4	89.34	102.69	81.46	121.33	114.11	96.27	148.32	169.53	143.28	120.16	136.18	127.95	110.38	103.14	139.67	125	127.55	133.02	121.11	122.13
31	1	4	90.28	100.76	108.7	116.68	113.37	108.48	128.24	136.72	134.01	119.65	137.7	93.26	84.76	37.7	134.7	102.12	97.29	68.62	61.06	35.74
32	2	4	92.76	98.05	101.26	136.45	119.92	133.4	139.31	150.59	165.25	155.55	179.21	122.87	138.89	20.86	122.09	114.1	110.26	82.12	91.09	16.67
chick 17 and 18 were removed due to developmental delay in one chick.
999 = missing value
SEX: 1=male, 2=female
